# Supplementary material for: MUC16 (CA125): tumor biomarker to cancer therapy, a work in progress
Source: Mol Cancer. 2014 May 29;13:129. doi: 10.1186/1476-4598-13-129 (PMC4046138; doi:10.1186/1476-4598-13-129)
Supplement: Additional file 2 — MUC16 mutations listed in TCGA data on ovarain cancer samples. [file 1476-4598-13-129-S2.xlsx]

## Sheet: Sheet1
Additional file 2. MUC16 mutations listed in TCGA data on ovarian cancer samples. This sheet lists mutations found in the samples included in the TCGA analysis.
Hugo_Symbol	Entrez_Gene_Id	Center	Ncbi_Build	Chrom	Start_Position	End_Position	Strand	Variant_Classification	Variant_Type	Reference_Allele	Tumor_Seq_Allele1	Tumor_Seq_Allele2	Dbsnp_Rs	Dbsnp_Val_Status	Tumor_Sample_Barcode	Tumor_Sample	Match_Norm_Sample_Barcode	Match_Norm_Seq_Allele1	Match_Norm_Seq_Allele2	Tumor_Validation_Allele1	Tumor_Validation_Allele2	Match_Norm_Validation_Allele1	Match_Norm_Validation_Allele2	Verification_Status	Validation_Status	Mutation_Status	Sequencing_Phase	Sequence_Source	Validation_Method	Score	Bam_File	Sequencer
MUC16	94025	genome.wustl.edu	36	19	8837817	8837817	+	Silent	SNP	G	G	A		Unknown	TCGA-13-0920-01A-01W-0421-09	TCGA-13-0920	TCGA-13-0920-10A-01W-0421-09	G	G	G	A	G	G	Unknown	Valid	Somatic	Phase_III	Capture		1	dbGAP	Illumina GAIIx
MUC16	94025	broad.mit.edu	36	19	8838643	8838643	+	Missense_Mutation	SNP	T	T	C	novel	none	TCGA-13-1512-01A-01W-0545-08	TCGA-13-1512	TCGA-13-1512-10A-01W-0546-08	T	T	C	C	T	T	Unknown	Valid	Somatic	Phase_I	Capture				Illumina GAIIx
MUC16	94025	genome.wustl.edu	36	19	8854365	8854371	+	Splice_Site	DEL	CCGCTCA	CCGCTCA	-		Unknown	TCGA-13-1481-01A-01W-0549-09	TCGA-13-1481	TCGA-13-1481-10A-01W-0549-09	CCGCTCA	CCGCTCA	CCGCTCA	-	CCGCTCA	CCGCTCA	Unknown	Valid	Somatic	Phase_III	Capture		1	dbGAP	Illumina GAIIx
MUC16	94025	genome.wustl.edu	36	19	8854503	8854503	+	Nonsense_Mutation	SNP	G	G	T	novel	Unknown	TCGA-13-0755-01A-01W-0372-09	TCGA-13-0755	TCGA-13-0755-10A-01W-0372-09	G	G	G	T	G	G	Unknown	Valid	Somatic	4	Capture		1	dbGAP	Illumina GAIIx
MUC16	94025	genome.wustl.edu	36	19	8859702	8859702	+	Silent	SNP	G	G	A	novel	Unknown	TCGA-13-0726-01A-01W-0372-09	TCGA-13-0726	TCGA-13-0726-10B-01W-0977-09	G	G	G	A	G	G	Unknown	Valid	Somatic	4	Capture		1	dbGAP	Illumina GAIIx
MUC16	94025	broad.mit.edu	36	19	8872463	8872463	+	Missense_Mutation	SNP	C	C	T	novel	none	TCGA-24-1422-01A-01W-0545-08	TCGA-24-1422	TCGA-24-1422-10A-01W-0545-08	C	C	T	T	C	C	Unknown	Valid	Somatic	Phase_I	Capture				Illumina GAIIx
MUC16	94025	broad.mit.edu	36	19	8879494	8879494	+	Missense_Mutation	SNP	G	G	T	novel	none	TCGA-24-2293-01A-01W-0799-08	TCGA-24-2293	TCGA-24-2293-10A-01W-0799-08	G	G	T	T	G	G	Unknown	Valid	Somatic	Phase_I	Capture				Illumina GAIIx
MUC16	94025	broad.mit.edu	36	19	8927447	8927447	+	Missense_Mutation	SNP	G	G	C	novel	none	TCGA-20-0987-01A-02W-0486-08	TCGA-20-0987	TCGA-20-0987-10A-01W-0486-08	G	G	C	C	G	G	Unknown	Valid	Somatic	Phase_I	Capture				Illumina GAIIx
MUC16	94025	genome.wustl.edu	36	19	8929974	8929974	+	Missense_Mutation	SNP	G	G	T	novel	Unknown	TCGA-24-1435-01A-01W-0549-09	TCGA-24-1435	TCGA-24-1435-10A-01W-0549-09	G	G	G	T	G	G	Unknown	Valid	Somatic	4	Capture		1	dbGAP	Illumina GAIIx
MUC16	94025	genome.wustl.edu	36	19	8933137	8933137	+	Missense_Mutation	SNP	C	C	G	novel	Unknown	TCGA-24-1435-01A-01W-0549-09	TCGA-24-1435	TCGA-24-1435-10A-01W-0549-09	C	C	C	G	C	C	Unknown	Valid	Somatic	4	Capture		1	dbGAP	Illumina GAIIx
MUC16	94025	genome.wustl.edu	36	19	8934638	8934638	+	Missense_Mutation	SNP	C	C	T	novel	Unknown	TCGA-10-0933-01A-01W-0421-09	TCGA-10-0933	TCGA-10-0933-11A-01W-0421-09	C	C	C	T	C	C	Unknown	Valid	Somatic	4	Capture		1	dbGAP	Illumina GAIIx
MUC16	94025	broad.mit.edu	36	19	8935946	8935946	+	Missense_Mutation	SNP	G	G	C	novel	none	TCGA-23-1031-01A-01W-0486-08	TCGA-23-1031	TCGA-23-1031-10A-01W-0486-08	G	G	C	C	G	G	Unknown	Valid	Somatic	Phase_I	Capture				Illumina GAIIx
MUC16	94025	genome.wustl.edu	36	19	8936296	8936296	+	Missense_Mutation	SNP	T	A	T	novel	Unknown	TCGA-25-1322-01A-01W-0494-09	TCGA-25-1322	TCGA-25-1322-10A-01W-0494-09	T	T	A	T	T	T	Unknown	Valid	Somatic	Phase_III	Capture			dbGAP	Illumina GAIIx
MUC16	94025	broad.mit.edu	36	19	8938660	8938660	+	Silent	SNP	C	C	A	novel	none	TCGA-61-2012-01A-01W-0722-08	TCGA-61-2012	TCGA-61-2012-11A-01W-0722-08	C	C	A	A	C	C	Unknown	Valid	Somatic	Phase_I	Capture				Illumina GAIIx
MUC16	94025	broad.mit.edu	36	19	8944768	8944768	+	Missense_Mutation	SNP	C	C	T	novel	none	TCGA-13-0913-01A-01W-0420-08	TCGA-13-0913	TCGA-13-0913-10A-01D-0399-08	C	C	T	T	C	C	Unknown	Valid	Somatic	Phase_I	Capture				Illumina GAIIx
MUC16	94025	broad.mit.edu	36	19	8946170	8946170	+	Silent	SNP	T	T	C	novel	none	TCGA-23-2081-01A-01W-0722-08	TCGA-23-2081	TCGA-23-2081-10A-01W-0722-08	T	T	C	C	T	T	Unknown	Valid	Somatic	Phase_I	Capture				Illumina GAIIx
MUC16	94025	broad.mit.edu	36	19	8947617	8947617	+	Missense_Mutation	SNP	G	G	T	novel	none	TCGA-24-2035-01A-01W-0722-08	TCGA-24-2035	TCGA-24-2035-10A-01W-0722-08	G	G	T	T	G	G	Unknown	Valid	Somatic	Phase_I	Capture				Illumina GAIIx
MUC16	94025	broad.mit.edu	36	19	8947728	8947728	+	Nonsense_Mutation	SNP	G	G	C	novel	none	TCGA-59-2351-01A-01W-0799-08	TCGA-59-2351	TCGA-59-2351-10A-01W-0800-08	G	G	C	C	G	G	Unknown	Valid	Somatic	Phase_I	Capture				Illumina GAIIx
MUC16	94025	broad.mit.edu	36	19	8948663	8948663	+	Missense_Mutation	SNP	C	C	A	novel	none	TCGA-24-2024-01A-02W-0722-08	TCGA-24-2024	TCGA-24-2024-11A-01W-0722-08	C	C	A	A	C	C	Unknown	Valid	Somatic	Phase_I	Capture				Illumina GAIIx
MUC16	94025	broad.mit.edu	36	19	8949834	8949848	+	In_Frame_Del	DEL	GCAGAGAGAGAAGTG	-	GCAGAGAGAGAAGTG	novel	none	TCGA-13-0913-01A-01W-0420-08	TCGA-13-0913	TCGA-13-0913-10A-01D-0399-08	GCAGAGAGAGAAGTG	GCAGAGAGAGAAGTG	-	-	GCAGAGAGAGAAGTG	GCAGAGAGAGAAGTG	Unknown	Valid	Somatic	Phase_I	Capture				Illumina GAIIx
MUC16	94025	genome.wustl.edu	36	19	8950509	8950509	+	Missense_Mutation	SNP	A	A	T	novel	Unknown	TCGA-13-0924-01A-01W-0421-09	TCGA-13-0924	TCGA-13-0924-10A-01W-0421-09	A	A	A	T	A	A	Unknown	Valid	Somatic	4	Capture		1	dbGAP	Illumina GAIIx

## Sheet: Sheet2
Supplementary File 2 (contd). MUC16 mutations listed in TCGA data on ovarain cancer samples. This sheet shows the changes in protein sequence and position of mutation in MUC16.
Start Position as per TCGA	End_Position as per TCGA	Blast start position	Blast End position	Sequence analyzed	Reference	Mutation	Mutation	Pre mutation	After mutation
8837817	8837817	8837787	8837847	GCCCATATCTGGTGAATACTGGAGATTGGAGATGGTGAAGTTGAGTGTGAGGGTCTTCAGG	G	G	A	LKTLTLNFTISNLQYSPDMG	LKTLTLNFTISNLQYSPDMG
8838643	8838643	8838613	8838673	TCGAGGAGGAAAAATGGCCCCAAATACCTGTTGTGGCTTCTGACAGAGGAGGCAGGAATGT	T	T	C	FLPPLSEATTAMGYHL	FLPPLSEATAGIWGHF
8854365	8854371	8854335	8854395	AAAGAGGAAGAATCTCCAACCACATCACAGCCGCTCACCATTGACATAGAGACTGTCCCTG	CCGCTCA	CCGCTCA	-	RDSLYVNG	RDSLYVNG
8854503	8854503	8854473	8854533	CCCAGGGCCTGTGGGGTCAGGGCGGTGGGTGCAGATGGCATCCACTCCGGTGGCTTCCCCA	G	G	T	GEATGVDAICTHRPDPTGPG	GEATGVDAICTHRPDPTGPG
8859702	8859702	8859672	8859732	CAGAGATGCGATTGATTTGTACTTACCCGAGGGACCAGGTTTAGAAACTGGAGTCCCAGAT	G	G	A	SGTPVSKPGPSA	SGTPVSKPGPSG
8872463	8872463	8872433	8872493	TGGGGTCAAGACGGTGGCTGCAGATGGCATCCATTCCAGTGGCTGCCCCATTCTTCTCAGG	C	C	T	PEKNGAATGMDAICSHRLDP	PEKNGAATGMNAICSHRLDP
8879494	8879494	8879464	8879524	GTTGAACTTCCTGGAGCCAGGGCGATGCATGTCCTCCTCATACTTCAGGTTGGTGATGGTG	G	G	T	TITNLKYEEDMHRPGSRKFN	TITNLKYEEEMHRPGSRKFN
8927447	8927447	8927417	8927477	GTGGATATTTCTGGCAAAACTGTGGACTGAGAAGGGCCAGGGATGGATGTTCTACCAGAGG	G	G	C	SGRTSIPGPSQSTVLPEIS	SGRTSIPGPCQSTVLPEIS
8929974	8929974	8929944	8930004	CAAGAGATGTCACCCCAGAAGGACCTGTTTGTGTGGCGATGGTCTTGTGTGTAGATATTGT	G	G	T	TISTHKTIATQTGPSGVTSL	TISTHKTIATKTGPSGVTSL
8933137	8933137	8933107	8933167	GTCTTTACTGTCTTTAGAAGTGGCCAGTATCTTATCTGAGGTGCTGCTGAAATTTGGAAGT	C	C	G	LPNFSSTSDKILATSKDSKD	LPNFSSTSDNILATSKDSKD
8934638	8934638	8934608	8934668	TTCATCTCCTGGAGGGTGCTGTTCTCTTTTCGTCCAGCAGTCAGGGAGGATGTTGGCTCTC	C	C	T	EPTSSLTAGRKENSTLQEM	EPTSSLTAGQKENSTLQEM
8935946	8935946	8935916	8935976	GTCAACAAAATATTGGAAGGCGAGGTTGTAGCATGGATAGGTACCAGGGAAGAGGAAGAGC	G	G	C	LVPIHATTSPSNILL	LVPIHGTTSPSNILL
8936296	8936296	8936266	8936326	TGAGCTGGATATTCTCTTAGAGGAGGTAATTTCTGTTCTAGGCCCCTTGGTGATCGCAGTG	T	A	T	TAITKGPRTEITSSKRISSS	TAITKGPRTDITSSKRISSS
8938660	8938660	8938630	8938690	TGACTTGGTTGGTGATGTGGTTCCTGTGGGCAGGTGAGAGATGCTGGTGCTGCCACTTCCT	C	C	A	GSGSTSISHLPTGTTSPTKS	GSGSTSISHLPTGTTSPTKS
8944768	8944768	8944738	8944798	TTGAGGTCTCTGACATGGTCAGGGTAGTCTCTGGGACTGTGCCAAGACTATCCGAAGCTAT	C	C	T	IASDSLGTVPETTLTMSETS	IASDSLGTVPKTTLTMSETS
8946170	8946170	8946140	8946200	ACCTGCGCTGTTTACTGGGATGCTTGTTTCTGTATTAGTAGTTGGATGGGACCCCAAAGGG	T	T	C	PLGSHPTTNTETSIPVNSAG	PLGSHPTTNTETSIPVNSAG
8947617	8947617	8947587	8947647	CTTCCTTCAGCATAGCTGGGTTCAAGAGAGGAGGAGAGAGCTGTATTTCCCTGTGTGTTCA	G	G	T	NTQGNTALSSSLEPSYAEG	NTQGNTALSYSLEPSYAEG
8947728	8947728	8947698	8947758	TCAGAAAGGACAGAGGAAACTCTTCCTAATGACTGGCTGATGCTTCTTCCTGGAGCACTAG	G	G	C	SAPGRSISQSLGRVSSVLS	SAPGRSISQ*LGRVSSVLS
8948663	8948663	8948633	8948693	AGTGGAGTGTTCAGTTGTGTCTGTGATGGTCCATGCTTTTGTGGCCGGACTGGTGAGATTG	C	C	A	NLTSPATKAWTITDTTEHST	NLTSPATKACTITDTTEHST
8949834	8949848	8949804	8949864	GGAGAAGTGAATTTAGAGACCATTACAGTAGCAGAGAGAGAAGTGGCAGAGGTTGAAACAG	GCAGAGAGAGAAGTG	-	GCAGAGAGAGAAGTG
8950509	8950509	8950479	8950539	GCTGCATTGCTTAGGGTCATGGAGGAAAGAACGGCTGAGCTGGGCTTTGTCTTTGTTGAGA	A	A	T	STKTKPSSAVLSSMTLSNA	STKTKPSSADLSSMTLSNA
